24 **Abstract**

25 Early-life experiences can shape adult behavior, with consequences for fitness and health, yet  
26 fundamental questions remain unanswered about how early social environments and experiences  
27 are translated into variation in brain and behavior. The African cichlid fish *Astatotilapia burtoni*,  
28 a model system in social neuroscience, is well known for its highly plastic social phenotypes in  
29 adulthood. Here, we rear juveniles in either social groups or pairs to investigate the effects of  
30 early-life social environments on behavior and neuroendocrine gene expression. We find that  
31 both juvenile behavior and neuroendocrine function are sensitive to early-life social effects.  
32 Behavior robustly co-varies across multiple contexts (open field, social cue investigation, and  
33 dominance behavior assays) to form a behavioral syndrome. Rearing environment shifts pair-  
34 reared juveniles towards the end of syndrome that is less active and socially interactive. Pair-  
35 reared juveniles also submit more readily as subordinates. In a separate cohort, we then measured  
36 neural expression for stress and sex hormone genes, signaling systems known to be  
37 developmentally plastic and involved in translating environmental conditions into biological  
38 responses and regulating adult social behavior. Rearing environment causes striking differences  
39 in neuroendocrine gene co-expression networks. Specifically, expression was tightly integrated  
40 in pair-reared juveniles, but not group-reared or isolated juveniles. Glucocorticoid receptor  
41 subtypes 1a, 1b, and 2, as well as androgen receptor  $\alpha$ , drive the significant differences between  
42 treatment groups, which supports a highly conserved role for the stress axis mediating early-life  
43 effects. Together, this research demonstrates the important developmental origins of behavioral  
44 phenotypes and identifies potential behavioral and neuroendocrine mechanisms.

45

46

47 **Key words:** early environment, ontogeny, social behavior, behavioral syndrome, hypothalamic-  
48 pituitary-adrenal axis, stress hormones, sex hormones

49

## 50 **Introduction**

51       Ontogeny has long been recognized as essential to understanding phenotype (Tinbergen,  
52 1963), yet the early-life origins of individual behavioral variation remain understudied.

53 Development reveals the proximate mechanisms by which genes interact with the environment  
54 during early life to sculpt the ‘machinery of behavior’ (Stamps, 2003; Tinbergen, 1963). Current  
55 or predicted environmental conditions can trigger developmental plasticity, and the resulting  
56 changes are often long-lasting, or even permanent, and can facilitate locally-adapted (e.g.,  
57 predator resistant, Gilbert, 2001) phenotypes (Kasumovic and Brooks, 2011; Lummaa and  
58 Clutton-Brock, 2002; Piersma and Drent, 2003; Snell-Rood, 2013; Stamps, 2003; Stearns, 1989;  
59 West-Eberhard, 1989). The developmental mechanisms that shape social behavior via underlying  
60 neural regulatory mechanisms should be a particularly important target for natural selection  
61 (Taborsky, 2016) because of the direct consequences of social behavior for fitness and health  
62 (e.g., Bennett et al., 2006; Meyer-Lindenberg and Tost, 2012; Silk, 2007; Solomon-Lane et al.,  
63 2015; Wilson, 1980).

64       Social stimuli are among the most important attributes of the early-life environment  
65 (Taborsky, 2016). Although maternal (and, to a lesser extent, paternal) interactions have largely  
66 been the focus (e.g., Champagne & Curley, 2005; McClelland, Korosi, Cope, Ivy, & Baram,  
67 2011), the broader early-life social environment is increasingly recognized for its role in  
68 behavioral and neural plasticity (Buist et al., 2013; Creel et al., 2013; Jonsson and Jonsson, 2014;  
69 Kasumovic and Brooks, 2011; Taborsky, 2016; White, 2010). For example, the early presence of

70 brood care helpers, unrelated adult males, and multiple mothers and litters have long-term effects  
71 on social behavior in the Daffodil cichlid fish *Neolamprologus pulcher* (Arnold and Taborsky,  
72 2010; Taborsky et al., 2012), brown-headed cowbirds (White et al., 2002), and laboratory mice  
73 (Branchi et al., 2013, 2006; D'Andrea et al., 2007), respectively. These features of the social  
74 environment alter the quality and quantity of social experiences and sensory cues perceived,  
75 which together influence neural function and behavior (Taborsky, 2016). Developmental  
76 plasticity may be limited to a single behavior or extend to an entire suite of behaviors (i.e., a  
77 behavioral syndrome), and the effects may be context-specific (Bell, 2007; Snell-Rood, 2013;  
78 Stamps, 2003; Stamps and Groothuis, 2010).

79        Neuroendocrine signaling is a primary mechanism by which environmental conditions  
80 and experience are translated into physiological responses (Crespi and Denver, 2005; Remage-  
81 Healey and Romero, 2000; Wingfield et al., 1990). Hormones are also important sources of  
82 individual variation in social behavior (e.g., across seasons, sexes, reproductive tactics) and  
83 underlie developmental plasticity relevant to adult behavior. The stress axis, or hypothalamic-  
84 pituitary-adrenal (interrenal in fish; HPA/I) axis, is widely implicated as a highly-conserved  
85 mechanism of early-life effects (Champagne and Curley, 2005; Francis et al., 1999; McClelland  
86 et al., 2011; Taborsky, 2016). In response to an environmental stressor, which includes any  
87 external condition that disrupts or threatens to disrupt homeostasis, the HPA/I axis integrates  
88 relevant internal and external cues and coordinates a response, such as changes in behavior and  
89 physiology. The stress response is initiated by the release of corticotropin-releasing factor (CRF)  
90 from the hypothalamus, which signals to the pituitary to release adrenocorticotrophic hormone,  
91 which then signals the adrenal glands to release glucocorticoids (e.g., cortisol in fish) (Denver,  
92 2009; Lowry and Moore, 2006).

93           Effects of early-life experiences on HPA/I axis function have been demonstrated in every  
94 major vertebrate lineage (e.g., birds: Banerjee, Arterbery, Fergus, & Adkins-Regan, 2012;  
95 mammals: Champagne & Curley, 2005; amphibians: Crespi & Denver, 2005; fish: Jonsson &  
96 Jonsson, 2014). For example, the presence of brood helpers during early-life affects *N. pulcher*  
97 cichlid social behavior via changes in neural expression levels of CRF and glucocorticoid  
98 receptor (GR), as well as receptor ratios (Taborsky et al., 2013). Stress axis mechanisms can also  
99 mediate the effects of the early-life social environment on human health (e.g., Turecki &  
100 Meaney, 2016). Sex steroid hormones (e.g., androgens, estrogens) also play a role mediating the  
101 long-term effects of early-life experiences (Adkins-Regan, 2009; Brown and Spencer, 2013;  
102 Shepard et al., 2009) and regulating social behavior (Goodson, 2005; Newman, 1999). For  
103 example, neural estrogen receptor expression is associated with maternal behavior in mother rats  
104 and offspring (Champagne et al., 2003; Champagne and Meaney, 2007), and socially stressed  
105 pre- and postnatal female guinea pigs have upregulated neural estrogen and androgen receptor  
106 levels, elevated testosterone, and masculinized behavior (Kaiser et al., 2003). Together, these and  
107 other neuroendocrine systems interact to affect behavior.

108           To investigate the effects of the early-life social environment on behavior and its  
109 neuroendocrine mechanisms, we used the highly social African cichlid *Astatotilapia burtoni*, a  
110 model system in social neuroscience (Fernald and Maruska, 2012; Hofmann, 2003). Adults of  
111 this species form mixed-sex, hierarchical communities with males of dominant or subordinate  
112 status and females. Dominant males are territorial, reproductively active, and colorful. In  
113 comparison, subordinate males shoal with females, are reproductively suppressed, and drab in  
114 coloration. Male status is socially regulated, and individuals regularly transition between status  
115 phenotypes (Fernald and Maruska, 2012; Hofmann, 2003). Adults, and juveniles (Fernald and

116 Hirata, 1979), express a suite of highly conserved social behaviors, including aggression,  
117 affiliation, courtship, and cooperation (Fernald, 2012; Hofmann, 2003; Weitekamp et al., 2017).  
118 Substantial progress has also been made towards understanding variation in stress and sex steroid  
119 hormone signaling, including in the regulation of social behavior (Chen and Fernald, 2008; Fox  
120 et al., 1997; Greenwood et al., 2003; Munchrath and Hofmann, 2010; O'Connell and Hofmann,  
121 2012a). All GRs (Greenwood et al., 2003), estrogen receptors (ER), and androgen receptors (AR)  
122 (Munchrath and Hofmann, 2010) have been studied in the adult *A. burtoni* brain, and  
123 neuroendocrine function can vary substantially. Subordinate males, for example, have lower  
124 levels of whole brain CRF and GR2 (Chen and Fernald, 2008), higher cortisol, and lower  
125 testosterone than dominants (Fox et al., 1997; O'Connell and Hofmann, 2012a), although these  
126 patterns can vary dynamically (Maguire and Hofmann, in prep.). The transcriptomic response in  
127 the preoptic area (POA) to pharmacological manipulation, such as an ER antagonist, is also  
128 status-specific (O'Connell and Hofmann, 2012a).

129         Given this rich literature on adult *A. burtoni*, it may seem surprising that the  
130 developmental origins of adult phenotypic variation remain largely unknown. The few studies  
131 that have investigated juveniles demonstrate the importance of early-life. For example, the  
132 development of male behavior and nuptial coloration, as well as reproductive maturation, are  
133 affected by the early-life social environment (Fernald and Hirata, 1979; Fraley and Fernald,  
134 1982). Gestational cues (e.g., maternal social crowding) also have lasting effects on methylation  
135 and transcription of the *gnrh1* gene in offspring (Alvarado et al., 2015). This result is particularly  
136 interesting given that preoptic GnRH1 neurons, which regulate gonadotropin release from the  
137 pituitary, are socially modulated in adults (Davis and Fernald, 1990; Hofmann and Fernald,  
138 2001). However, studies of the effects of different early-life experiences on other neuroendocrine

139 pathways or behavior are lacking.

140           In the present study, we conducted two experiments to test the hypothesis that the early-  
141 life social environment generates variation in juvenile behavior through neuroendocrine gene  
142 expression. We manipulated the early-life social environment, and consequently social  
143 experience, by rearing juveniles in either social groups or pairs. In the group condition, social  
144 experience implies interactions with more social partners, who also vary in size, sex, experience,  
145 and patterns of behavior. Interactions in groups can also involve more than two individuals, and  
146 it is possible to observe and learn from interactions of group members as a bystander. Although  
147 it has not been tested in juveniles, adults are capable of gaining important social information as a  
148 bystander (Desjardins et al., 2012, 2010; Grosenick et al., 2007). In the pair condition, juveniles  
149 occupy only one social role in a relationship with just one other individual. Similar  
150 manipulations of early-life social complexity have been important for behavioral and neural  
151 development in other species (reviewed in Taborsky, 2016). We predicted that rearing  
152 environment would affect a suite of social behaviors across contexts, including social  
153 investigation, dominant, and subordinate behavior. In the brain, we predicted effects on whole  
154 brain gene expression of neuroendocrine systems that mediate early-life experiences. Related to  
155 the HPA/I axis, we measured glucocorticoid receptor 1a (GR1a), glucocorticoid receptor 1b  
156 (GR1b), glucocorticoid receptor 2 (GR2) (nomenclature from Maruska & Fernald, 2010),  
157 mineralocorticoid receptor (MR), and CRF. For sex steroid hormone signaling, we quantified  
158 androgen receptor  $\alpha$  (AR $\alpha$ ) and estrogen receptor  $\alpha$  (ER $\alpha$ ). By investigating these early-life  
159 effects in juveniles, we can identify important intermediary steps that inform how developmental  
160 plasticity may shape the adult phenotype.

161

162 **Methods**

163 *Animals*

164 Juvenile *A. burtoni* came from a laboratory population descended from a wild-caught  
165 stock. The adults that bred the juveniles were housed in naturalistic social groups of males and  
166 females. Dominant males court gravid females that then lay eggs in his territory. The female then  
167 scoops up the eggs into her mouth, where the male fertilizes them. The mother orally incubates  
168 the larvae as they develop for 10-13 days. Under natural (and some laboratory) conditions,  
169 juveniles remain close to their mother for the 2-4 weeks following their initial release from her  
170 mouth. As they age, juveniles seek shelter in her mouth less and less often. In the first two  
171 weeks, juveniles primarily school together, with overt social interactions beginning at 2-3 weeks  
172 old (Fernald and Hirata, 1979; Renn et al., 2009). Social behaviors, such as chasing, nipping,  
173 territorial displays, emerge in a predictable sequence as juveniles approach reproductive  
174 maturity, which can occur as early as 15 weeks, depending on the early-life social conditions  
175 (Fernald and Hirata, 1979; Fraley and Fernald, 1982).

176 We removed juveniles from the mother's mouth 6-12 days post-fertilization. Once  
177 sufficiently developed (~day 12, freely swimming with no remaining yolk), juveniles were  
178 transferred into experimental rearing environments. Juveniles are all silver (drab) in coloration,  
179 and none developed coloration during the study, which would indicate reproductive maturity for  
180 males. Sex cannot be determined anatomically until maturation; therefore, the sex ratios of our  
181 rearing environments, and the sex of the focal individuals, is unknown. The sex ratio of *A.*  
182 *burtoni* broods is approximately 1:1. All work was done in compliance with the Institutional  
183 Animal Care and Use Committee at The University of Texas at Austin.

184



185 *Experimental rearing conditions (Experiments 1 & 2)*

186 As the first study of this kind in this species, we opted to quantify behavior and gene  
187 expression in separate experiments in order to capture different developmental time points. In  
188 Experiment 1, juveniles for the behavioral assays were reared in social groups of 16 fish (n=12  
189 groups) or in pairs (n=9 pairs) for 58-73 days (average  $65.76 \pm 0.81$ ; ~8-10 weeks), as long of a  
190 duration that could be used without juveniles reaching reproductive maturity. In Experiment 2,  
191 neural gene expression was measured in a separate cohort of juveniles reared in social groups of  
192 16 fish, pairs, or in isolation for 1 week (groups: n=8; pairs: n=8; isolates: n=8) or 5 weeks  
193 (groups: n=14; pairs: n=10). Here, we aimed to capture early changes in gene expression that  
194 might set individuals along different developmental trajectories. Isolation was included because  
195 we expected it to impact gene expression in this highly social species, not as a social control. We  
196 cannot distinguish between the effects of chronological age from the treatment duration (i.e., 1  
197 vs. 5 weeks) in this study.

198 For both Experiments, juveniles from multiple clutches of the same age and  
199 developmental stage (day 12-14 fry) were divided among treatment groups. Group-reared fish  
200 were housed in 35 L aquaria with three shards of terracotta pots for a shelter and/or territory.  
201 Pairs and isolated fish were housed in small aquaria (22.9 x 15.2 x 15.2 cm) with one terracotta  
202 pot shard. The volume of water per fish was similar for the group (2.6 L) and paired (2.7 L)  
203 treatments. Juveniles were fed daily with Hikari plankton (Pentair Aquatic Eco-Systems, Cary,  
204 NC). The food was mixed in water, and a transfer pipette was used to deliver a set volume to  
205 each tank. Groups received eight times more food than pairs. Pairs and isolated fish received the  
206 same amount. All juveniles were maintained on a 12:12 light/dark cycle.

207

208 *Experiment 1: Behavioral assays*

209 Behavior for both members of the pairs (n=18 individuals) and two fish from each group  
210 (n=24 individuals) was analyzed. To choose focal individuals from the groups, we removed all  
211 fish from the aquarium and selected the largest fish. Because size is a strong predictor of social  
212 dominance (Alcazar et al., 2014), this individual was very likely to have dominance experience,  
213 similar to the larger fish in the pair. A smaller fish was then chosen such that the ratio of large-  
214 to-small fish standard length (SL, mm) was approximately equal in the group and a pair from the  
215 same cohort of juveniles (same age). Standard length was recorded for all focal fish. Behavior  
216 was observed in novel, small aquaria (22.9 x 15.2 x 15.2 cm) without covers. For analysis, the  
217 aquaria were divided into 4 zones (Fig 1), delineated with permanent marker. In the middle of  
218 each short side, a circle was drawn (28 mm diameter) to indicate the placement of the  
219 scintillation vial (see below: social cue investigation). An arc 2.54 cm from the edge of that  
220 circle was drawn to form a semicircle. One semicircle was designated the “territory” zone and  
221 had a terracotta pot shard for a shelter and/or territory. The other semicircle was designated the  
222 “investigate” zone. The “close” zone was between the territory zone and halfway along the long  
223 side of the tank. The “far” zone was between the halfway mark and the investigate zone (Fig 1).  
224 Video cameras recorded behavior from above so that all areas of the tank, except under the  
225 terracotta pot shard, were visible. Solomon Coder was used for analysis  
226 ([www.solomoncoder.com](http://www.solomoncoder.com)).

227 We quantified behavior in four assays, which were always presented in the same  
228 sequence (Fig. 1): an open field test that is commonly used in other species to assess activity and  
229 anxiety (e.g., Cachat et al., 2010; Prut & Belzung, 2003); a social cue investigation as a measure  
230 of social motivation or preference (e.g., Bonuti & Morato, 2018; Moy et al., 2004); and social

231 interactions within either dominant or subordinate status contexts, which regularly occur in  
232 social communities of *A. burtoni* (Hofmann, 2003). All observations were made by the same  
233 observer who was blind to treatment.

234 Open field test: The focal fish was transferred to the test aquarium with a hand net and  
235 remained in the tank alone for 30 min. Movement around the tank was observed from minutes 20  
236 to 30. We recorded the number of times a fish crossed into each zone (frequency) and the time  
237 (s) spent in each zone. Social cue investigation: Novel juveniles were collected from a  
238 community tank and placed into scintillation vials (20 mL). The top of the vial was covered with  
239 parafilm with holes to allow water through. A vial containing one cue fish was placed into each  
240 test aquarium (n=16 group-reared, n=13 pair-reared). Cue fish were 0-6.4 mm SL (average  $3.37$   
241  $\pm 0.27$ ) smaller than their focal fish. An empty vial was used as a control (n=8 group-reared, n=5  
242 pair-reared). The social cues were in the aquarium for 30 min. Movement around the tank  
243 (frequency and time in each zone) was scored from minutes 2 to 12.

244 Dominance behavior: The scintillation vials were removed from the aquaria and a novel  
245 smaller fish (by 1-6.4 mm SL, average  $3.37 \pm 0.25$ ) was immediately added to each aquarium,  
246 freely swimming with the focal fish. The pair remained together for 30 minutes, and behavior  
247 was scored from minutes 2 to 12. Subordinate behavior: The small cue fish was removed from  
248 the aquaria and a novel, larger fish (by 2.4-12 mm SL, average  $5.74 \pm 0.34$ ) was immediately  
249 added to each aquarium, freely swimming with the focal fish. The pair remained together for 30  
250 minutes, and behavior was scored from minutes 2 to 12. In the dominance and subordinate  
251 behavior assays, we analyzed agonistic interactions between the pair. An approach was defined  
252 as one fish swimming directly towards any part of the other fish's body, within 3 body lengths. If  
253 the approached fish responded by moving away, in any direction, the behavior was recorded as a

254 displacement for the initiator and a submission for the responder. From these measures, we  
255 calculated agonistic efficiency, or the proportion of approaches that led to a displacement  
256 (Solomon-Lane et al., 2014), for focal and cue fish. The difference in agonistic efficiency  
257 between the focal and cue fish was used as a measure of agonistic asymmetry, which  
258 characterizes status relationships (Drews, 1993). We also recorded the frequency of entering and  
259 the time spent in the territory, for the focal fish, cue fish, and both together.

260         Importantly, after 8-10 weeks in their respective treatment condition, group-reared  
261 juveniles were significantly larger than pair-reared juveniles (see Results). This size difference  
262 influenced the size of the fish selected to be the social stimuli. Specifically, the difference in SL  
263 (in mm) between the focal fish and the social cue (t-test:  $t=3.38$ ,  $p=0.0016$ ), as well as the focal  
264 fish and the small cue fish ( $t=3.476$ ,  $p=0.0013$ ), was significantly greater for group-reared  
265 juveniles. The size difference (SL) between the focal fish and the large cue fish was significantly  
266 greater for pair-reared juveniles ( $t=-3.22$ ,  $p=0.0025$ ). Relative size differences followed the same  
267 pattern as absolute size differences (data not shown).

268

### 269 *Experiment 2: Whole brain gene expression*

270         Gene expression for two fish from each group (1 week:  $n=8$ ; 5 weeks:  $n=14$ ), both  
271 members of the pairs (1 week:  $n=8$ ; 5 weeks:  $n=10$ ), and every isolate (1 week:  $n=8$ ) was  
272 analyzed. Focal individuals from the group condition were selected haphazardly. Juveniles were  
273 removed from their rearing environments with a hand net and rapidly decapitated. The brains  
274 were dissected immediately, flash frozen on dry ice, and stored at  $-80^{\circ}\text{C}$  until processing. Gene  
275 expression was quantified using qPCR and previously validated primers (Supplemental Table 1,  
276 Chen and Fernald, 2008; Greenwood et al., 2003; O'Connell and Hofmann, 2012a) for GR1,

277 GR2a, GR2b, MR, CRF, AR $\alpha$ , and ER $\alpha$ , as well as control genes 18S and G3PDH. RNA was  
278 extracted using the Maxwell 16 LEV simplyRNA Tissue Kit (Promega, Madison, WI), and the  
279 Promega GoScript Reverse Transcription System (Promega, Madison, WI) was used for reverse  
280 transcription. PowerUp SYBR Green Master Mix (ThermoFisher Scientific, Waltham, MA) was  
281 used for quantitative PCR. All standard kit protocols were followed. Relative gene expression  
282 levels were quantified using  $\Delta\Delta$ CT analysis, using 18S and G3PDH as reference genes. The  
283 results are largely concordant independent of the reference gene used. Here, we present the  
284 analyses for 18S, as this gene has shown very little expression variation across social phenotypes  
285 in transcriptome studies of *A. burtoni* (O'Connell and Hofmann, 2012a; Renn et al., 2008).

286

#### 287 *Statistical analyses*

288 All statistical analyses were conducted using R Studio (version 1.0.143). Results were  
289 considered significant at the  $p < 0.05$  level, and averages  $\pm$  standard error of the mean are included  
290 in the text. The box of the box and whisker plots show the median and the first and third  
291 quartiles. The whiskers extend to the largest and smallest observations within or equal to 1.5  
292 times the interquartile range. Comparisons between group- and pair-reared juveniles were  
293 conducted using t-tests for fish SL, time and frequency in each tank zone, and rates of agonistic  
294 behavior. Mann-Whitney-Wilcoxon tests were used for data that did not meet the assumptions of  
295 parametric statistics. Regression analysis was used to identify significant associations between  
296 SL and frequency and time in a zone and between SL and agonistic behavior. We used a false  
297 discovery rate correction for regressions with focal fish SL (Benjamini and Hochberg, 1995).  
298 Two-way ANOVAs were used to identify significant effects of rearing environment, presence of  
299 the social cue, or an interaction, on the frequency and time spent in each zone of the tank. We

300 used Principal Components Analysis (PCA) to identify how behaviors clustered across the four  
301 assays and for each assay individually. T-tests were used to compare principal component scores  
302 between group- and pair reared juveniles. Correlation analysis was used to identify significant  
303 associations among principal components (PCs).

304 Gene expression data did not meet the assumptions of parametric statistics; therefore, the  
305 effects of rearing environment (group, pair, isolated) and treatment duration (1 week, 5 weeks)  
306 were analyzed separately using Kruskal-Wallis tests or one-way ANOVA and Mann-Whitney-  
307 Wilcoxon tests, respectively. To get a tentative estimate for possible interaction effects, we  
308 conducted two-way ANOVAs. These analyses, along with visual inspection of the data, do not  
309 suggest any interactions between rearing environment and treatment duration. We also used PCA  
310 to identify how the expression of candidate genes clustered. T-tests, or Mann-Whitney-Wilcoxon  
311 tests if appropriate, were used to compare group- and pair-reared juveniles and expression  
312 following 1 vs. 5 weeks in rearing environments. Dunn's test was used for *post hoc* analysis of  
313 significant results. Partial correlation networks were calculated using the "ppcor" package in R  
314 and visualized using "qgraph." The nodes of the networks represent the gene. The edges are the  
315 partial correlation coefficient, with thicker edges indicating stronger correlations. Only  
316 significant correlations are shown. Mantel tests were used to test for pairwise differences  
317 between the gene expression networks. A non-significant p-value ( $> 0.05$ ) indicates that the  
318 partial correlation matrices are not related.

319

## 320 **Results**

### 321 *Experiment 1*

#### 322 Open field test and social cue investigation

323 In the open field test (and subsequent assays), juveniles of both treatment groups moved  
324 readily around the novel environment with minimal acclimation. We present the data for the  
325 frequency of entering each zone. There were no significant effects for the time spent in each  
326 zone ( $p>0.05$ ). Group-reared juveniles entered the territory (Mann-Whitney-Wilcoxon test:  
327  $W=299$ ,  $p=0.034$ ), close ( $W=293.5$ ,  $p=0.049$ ), and investigate zones ( $W=293.5$ ,  $p=0.049$ )  
328 significantly more frequently than pair-reared juveniles. There was no significant difference for  
329 the far zone ( $W=289$ ,  $p=0.064$ ).

330 Next, we used a social cue investigation task to examine whether and how rearing  
331 environment and/or the presence of the social cue affect locomotor activity. Two-way ANOVA  
332 revealed that, following the addition of the social cue, juveniles entered the investigate zone  
333 significantly more frequently than controls ( $F_{1,36}=4.91$ ,  $p=0.033$ ). There was no effect of rearing  
334 environment ( $F_{1,36}=1.69$ ,  $p=0.20$ ) and no interaction ( $F_{1,36}=0.046$ ,  $p=0.83$ ). There was no effect  
335 of rearing environment ( $F_{1,36}=2.68$ ,  $p=0.11$ ), social cue ( $F_{1,36}=0.87$ ,  $p=0.36$ ), or an interaction  
336 ( $F_{1,36}=0.84$ ,  $p=0.37$ ) on frequency of entering the far zone. Group-reared juveniles entered the  
337 close zone significantly more than pair-reared juveniles ( $F_{1,35}=4.47$ ,  $p=0.042$ ), but there was no  
338 effect of the social cue ( $F_{1,35}=0.11$ ,  $p=0.74$ ) and no interaction ( $F_{1,35}=0.44$ ,  $p=0.52$ ). There was no  
339 effect of rearing environment ( $F_{1,35}=3.28$ ,  $p=0.079$ ), social cue ( $F_{1,35}=0.17$ ,  $p=0.68$ ) and no  
340 interaction ( $F_{1,35}=0.83$ ,  $p=0.37$ ) on the frequency of entering the territory zone. Linear regression  
341 analyses of the relationship between SL and the frequency of entering zones of the tank are  
342 shown in Table 1.

343

#### 344 Dominant and subordinate behavior

345 Interestingly, rearing environment did not affect rates of focal fish behavior. As the

346 dominant fish, there were no differences in approaching ( $W=242.5$ ,  $p=0.20$ ) or displacing  
347 ( $W=253$ ,  $p=0.12$ ) the small cue fish. As the subordinate, there were no differences in  
348 approaching ( $W=205.5$ ,  $p=0.85$ ), displacing ( $W=214.5$ ,  $p=0.62$ ), or submitting to ( $W=217.5$ ,  
349  $p=0.56$ ) the large cue fish. In the dominance assay, rearing environment did not affect agonistic  
350 efficiency for the focal fish ( $t=0.83$ ,  $p=0.41$ ), small cue fish ( $W=115.5$ ,  $p=0.97$ ), or the  
351 difference between the pair ( $t=1.03$ ,  $p=0.32$ ). In the subordinate assay, although there was no  
352 effect of rearing environment on agonistic efficiency for the focal fish ( $W=169.5$ ,  $p=0.28$ ) or the  
353 large cue fish ( $W=112.5$ ,  $p=0.061$ ), the difference in agonistic efficiency was significantly higher  
354 for pair-reared juveniles ( $p=0.022$ ). See Table 1 for linear regression analyses of SL with  
355 behavior.

356

### 357 Multivariate analysis across assays

358 In order to gain more insight into this multivariate dataset, we employed PCA to  
359 determine which measures of morphology (i.e., size) and behavior act in concert to explain  
360 different aspects of the variability across individuals. We first conducted a PCA that included  
361 variables from each of the four assays (focal fish SL; frequency of entering each zone in the open  
362 field test and social cue investigation; focal fish social approaches and displacements as a  
363 dominant towards the small cue fish; and focal fish approaches, displacements, and submissions  
364 as a subordinate with the larger cue fish). We found that principal component (PC) 1 accounts  
365 for 43.3% of the variation and differs significantly between group- and pair-reared juveniles  
366 ( $p=0.029$ , Fig 2A). As the vector plot in Fig 2B shows, variables from the open field test, social  
367 cue investigation, and dominance behavior assay all load on PC1, along with focal fish SL.  
368 Measures of subordinate behavior do not contribute. There were no significant treatment



369 differences in higher order PCs except for PC6, which accounted for 5.0% of the variation in the  
370 data and contained significantly higher values for group-reared compared to pair-reared juveniles  
371 ( $p=4.082e-05$ , Fig 2C). Focal fish SL loads most strongly on PC6 (data not shown). This is  
372 entirely in accordance with the finding that after 8-10 weeks in their respective early-life  
373 environments, group-reared juveniles ( $16.85 \pm 0.32$  mm SL) were significantly larger than pair-  
374 reared juveniles ( $13.76 \pm 0.40$  mm SL) ( $t=6.00$ ,  $p=7.25e-07$ ).

375 To better understand how rearing environment affected behavior within the assays that  
376 contributed to the treatment difference, we conducted PCAs for the open field, social cue  
377 investigation, and dominance behavior assays separately. We expanded these analyses to include  
378 all of the measured variables, for the focal and cue fish. The open field test analysis included  
379 focal fish SL and the frequency of entering and time in each zone of the tank. The social cue  
380 investigation included the same measures, as well as the SL of the cue fish. Finally, the  
381 dominance behavior analysis included SL of the focal fish and small cue fish, approaches and  
382 displacements of both fish, and the frequency of entering and time spent in the territory by either  
383 or both fish. For each analysis, PC1 differed significantly between group- and pair-reared  
384 juveniles: open field (43.4% variation,  $p=0.04$ , Fig 3A), social cue investigation (37.2%  
385 variation,  $W=102$ ,  $p=0.0032$ , Fig 3B), and dominance behavior (29.8% variation,  $W=128$ ,  
386  $p=0.025$ , Fig 3C). The PC1s were also significantly and linearly correlated with each other (Fig  
387 3D, open field x social cue:  $r^2=0.46$ ,  $p=5.33e-07$ ; open field x dominance:  $r^2=0.33$ ,  $p=4.69e-05$ ;  
388 social cue x dominance:  $r^2=0.46$ ,  $p=4.97e-07$ , Supplemental Figure 1). We found no significant  
389 differences for any higher order PCs in the three analyses. See Supplemental Figure 2 for the  
390 proportion of variation explained by each PC.

391 For the open field test, all variables loaded on PC1 except time in the territory and

392 investigate zones. For the social cue investigation, all variables loaded on PC1 except time in the  
393 territory, investigate, and close zones. Finally, for dominance behavior, the strongest loadings for  
394 PC1 include approaches and displacements by the focal and small cue fish, the frequency of the  
395 focal fish entering the territory, the time spent in the territory by the small cue fish, and the SL of  
396 both the focal and small cue fish (Supplemental Figure 3).

397

## 398 *Experiment 2*

### 399 Neural gene expression patterns

400 Neuroendocrine signaling is a primary mechanism by which early-life experiences are  
401 translated into biological changes. To identify potential mediators of the behavioral effects we  
402 identified, we measured mRNA levels of genes involved in the stress axis and in sex steroid  
403 signaling in the brains of a separate cohort of juveniles. We compared relative expression across  
404 rearing environments (isolation, pairs, groups) and time in rearing environment (1 week, 5  
405 weeks). Overall, there was little significant variation in neural gene expression with regards to  
406 either rearing environment or treatment duration ( $p>0.05$ , Fig 4, Supplemental Fig 4,  
407 Supplemental Table 2). There was a significant effect of rearing environment on GR1a  
408 expression (Kruskal-Wallis:  $\chi^2_2=16.58$ ,  $p=0.00025$ ). *Post hoc* analysis showed that expression  
409 was significantly higher in groups-reared juveniles than pair-reared ( $p=0.0015$ ) or isolated  
410 ( $p=0.0015$ ) juveniles, which did not differ from each other ( $p=0.39$ ). Expression of GR2  
411 ( $F_{2,43}=4.22$ ,  $p=0.021$ ) and CRF ( $\chi^2_2=6.17$ ,  $p=0.046$ ) also differed significantly among rearing  
412 environments; however, *post hoc* analyses showed there were no significant pair-wise  
413 differences ( $p>0.05$ ).

414 Genes function within regulatory networks, rather than in isolation, and they can affect

415 each other's expression. Similarly, a common upstream regulator may control multiple  
416 functional networks of genes. Because of their known effects on physiology and behavior, these  
417 candidate genes are likely to function in pathways that interact with each other. To quantify how  
418 rearing environment affects gene co-expression, we calculated partial correlation networks (Fig  
419 5). Partial correlations show the associations between gene pairs, independent of other  
420 correlations in the network. Comparing the group and pair networks (Mantel test:  $p=0.31$ ), the  
421 group and isolate networks ( $p=0.61$ ), and the pair and isolate networks ( $p=0.12$ ) revealed that  
422 there was no evidence that any of these networks were similar to any other.

423 To gain a more holistic understanding of how rearing environment and/or treatment  
424 duration affect variation in neuroendocrine gene expression, we used PCA. PC1 accounts for  
425 69.1% of the variation in the data. While there were no differences in PC1 based on rearing  
426 environment ( $W=113$ ,  $p=0.13$ ), there was a trend for differences based on treatment duration  
427 ( $W=99$ ,  $p=0.053$ ; Fig 6A). There were no differences due to rearing environment for any higher  
428 order PCs except for PC4, which accounted for 5.7% of the variation in the data and differed  
429 significantly according to rearing environment ( $p=0.011$ ; Fig 6B). Fig 6C shows how the  
430 different candidate genes load onto PC1 and PC4.

431

## 432 **Discussion**

433 In the present study, we demonstrate that juvenile *A. burtoni* behavior and  
434 neuroendocrine gene expression are both sensitive to early-life social effects. By rearing  
435 juveniles in different social environments—either in a social group or as a pair, both of which  
436 allow individuals to interact freely at all times—we altered the quality and quantity of social  
437 experiences and sensory cues perceived and set individuals along different developmental

438 trajectories. Behaviorally, the early-life environment shifted juveniles in a predictable manner  
439 along a continuum of a novel behavioral syndrome (i.e., correlated behaviors across contexts, see  
440 below) comprised of open field, social cue investigation, and dominance behaviors (Fig 2, Fig 3)  
441 and affected patterns of subordinate behavior, a critically important social role for young  
442 individuals. In the brain, rearing environment caused striking changes in neuroendocrine gene  
443 co-expression patterns, differences driven by the expression of GRs and AR. Together, these  
444 experiments provide an essential step towards understanding how developmental plasticity  
445 generates the individual variation in behavior and neuroendocrine function that has fitness and  
446 health consequences in adulthood (e.g., Champagne, 2010; Turecki and Meaney, 2016). Our  
447 results also contribute to an important and growing literature on the impact of early-life social  
448 environments beyond parental interactions (Champagne and Curley, 2005; Taborsky, 2016),  
449 using a species that, despite its prominence in social neuroscience (Fernald and Maruska, 2012;  
450 Hofmann, 2003), has rarely been studied during development (Alvarado, Lenkov, Williams, &  
451 Fernald, 2015; Fernald & Hirata, 1979; Fraley & Fernald, 1982).

452

#### 453 Juvenile behavior forms a syndrome affected by early-life social environment

454       Using a battery of four behavioral assays to gain a comprehensive understanding of  
455 behavioral phenotype, within and across contexts (Fig 1), we discovered that open field, social  
456 cue investigation, and dominance behavior together formed a behavioral syndrome (Fig 3).  
457 Syndromes are a population-level metric defined as the correlation between rank-order  
458 differences between individuals, across contexts and/or over time (Bell, 2007). The presence of a  
459 syndrome indicates consistency in patterns of individual behavior across contexts and/or over  
460 time (Bell, 2007; Sih et al., 2004a, 2004b). Our data suggest that how individuals move around

461 in space is relevant to the social role they play. Specifically, juveniles that were more active in  
462 the open field test were more likely to be active in the social cue investigation and more  
463 interactive in the dominance assay. Interestingly, behavior from the subordinate assay does not  
464 contribute to the treatment effect or syndrome, likely because subordinate focal individuals  
465 respond primarily to the dominant fish's behavior. To our knowledge, this is the first behavioral  
466 syndrome to be identified in *A. burtoni* at any developmental stage.

467 Behavior patterns may coalesce into a syndrome due to shared mechanisms (e.g.,  
468 neuroendocrine regulation), early-life experiences that set individuals along developmentally  
469 plastic trajectories, or correlational selection (Bell, 2007; Ketterson and Nolan, Jr., 1999; Stamps,  
470 2003). We found that the behavior of all juveniles was described by the same syndrome,  
471 indicating that how the behaviors are related across experimental contexts (i.e., assays) was  
472 maintained independently of the early-life social environment. Whether an individual was reared  
473 in a group or pair then dictates where along the continuum of the syndrome they fall (Fig 3D).  
474 Pair-reared juveniles appear restricted to one end, whereas group-reared juveniles are represented  
475 along the full range of behavioral variation. That there are group-reared juveniles that  
476 behaviorally resemble the pair-reared individuals suggests there may be social environments  
477 within a group (Saltz et al., 2016) that share key elements with the paired experience.  
478 Conversely, the range of possible social roles seems much more restricted in the paired  
479 treatment. To identify the causal behavioral and/or sensory cues, it will be necessary to conduct  
480 detailed observations of individuals within the rearing environments (Taborsky, 2016). Based on  
481 our pilot observations, we hypothesize that the complexity of interactions and/or abundance of  
482 social sensory cues in groups cause these treatment differences (Taborsky, 2016, e.g., Arnold &  
483 Taborsky, 2010).

484 Activity and social interaction are common components of syndromes in other species,  
485 along with bold-shy and proactive-reactive behaviors (Bell, 2007; Conrad et al., 2011; Groothuis  
486 and Carere, 2005; Koolhaas et al., 1999; Sih et al., 2004b; Verbeek et al., 1994). For example,  
487 large juvenile brown trout are more active and aggressive (Näslund and Johnsson, 2016), similar  
488 to our results. Activity-aggression syndromes are also found in a number of other fish species  
489 (reviewed in Conrad et al., 2011). For *A. burtoni* juveniles, locomotor activity and social  
490 interaction may be causally related. First, active individuals may encounter conspecifics more  
491 frequently and, as a result, initiate more interactions. Second, juvenile social interactions appear  
492 to be prosocial in that they increase the likelihood of future proximity and interaction. In the  
493 dominance behavior assay, approaches and displacements for both the focal and subordinate cue  
494 fish load in the same direction on PC1. Correlation analysis (data not shown) confirms that, as  
495 one member of the pair initiates social interactions, the other member also initiates, potentially  
496 leading to more activity. This may be beneficial by increasing shoaling and reducing the risk of  
497 predation. Interestingly, adult dominance behavior does not lead to a prosocial response in  
498 subordinates, suggesting that although social behavior appears similar across life history stages  
499 (Fernald and Hirata, 1979; Fraley and Fernald, 1982), there are important differences.

500

#### 501 Size plays a secondary role in determining juvenile behavioral phenotype

502 Size is central to understanding juvenile activity, social interactions, and the effects of the  
503 early-life social environment. Group-reared juveniles were larger than those reared in pairs, and  
504 SL was positively associated with activity in the open field and social cue investigation assays,  
505 approaching and displacing as a dominant fish, as well as entering the territory zone, alone or  
506 with the cue fish, in the dominance behavior assay. The importance of size in juveniles is

507 consistent with the research showing that adult *A. burtoni* are highly sensitive to size during  
508 social interactions (Alcazar et al., 2014; Weitekamp & Hofmann, 2017). Growth is also socially  
509 regulated in both juveniles and adults (Fraley and Fernald, 1982; Hofmann et al., 1999; this  
510 study). However, the effect of the early social environment is much larger and more complex  
511 than size alone. First, the PCA of behavior from all four assays shows that focal fish SL  
512 contributes only moderately to the significant treatment difference for PC1 (Fig 2B), as many  
513 other variables load much more strongly on PC1 (i.e., open field, social cue investigation, and  
514 dominance behaviors) (see also: Supplemental Fig 3). Second, SL is the strongest contributing  
515 variable for PC6, which represents the significant size difference between group-reared and pair-  
516 reared individuals discussed above, yet contributes only 5% to the overall variation in the data.  
517 Finally, the group-reared juveniles that fall within the range of pair-reared juveniles along the  
518 continuum of the behavioral syndrome (i.e., high PCA scores, Fig 3) are not the smallest  
519 individuals. While size may be secondary for understanding early-life effects in juveniles, it  
520 remains to be tested how individual behavior changes over time in relation to both size and  
521 developmental stage, which can be decoupled from chronological age in fish (Jonsson and  
522 Jonsson, 2014).

523

#### 524 Early-life social experience affects social dynamics when focal juveniles are subordinate

525       Developmental plasticity can shift behavior in ways that ultimately benefit fitness (Smith  
526 and Blumstein, 2008), in part because social behavior has direct consequences for reproductive  
527 success (Wilson, 1980, e.g., Henry et al., 2013; Robbins et al., 2007; Young et al., 2006). A  
528 majority (64%) of studies show that experimentally increasing the frequency, diversity, or  
529 complexity of early-life social experiences enhances social skills or competence (Taborsky,

530 2016). For example, juvenile *N. pulcher* cichlids reared with brood helpers demonstrated more  
531 context-appropriate behavior when establishing status, integrating into novel groups, and  
532 competing for a resource (Arnold and Taborsky, 2010; Fischer et al., 2015; Taborsky et al.,  
533 2013, 2012). We have no evidence of an advantage for group-reared juveniles; however,  
534 juveniles may fill the subordinate role differently. While nearly all focal fish successfully  
535 established themselves as subordinate (88%) in the assay, and there were no treatment  
536 differences in approaches or displacements, there was a significantly larger asymmetry in  
537 agonistic efficiency for pair-reared juveniles. There was also a trend for pair-reared juveniles to  
538 submit more readily (measured as large fish agonistic efficiency). Status relationships are  
539 defined by asymmetrical agonistic displays (Drews, 1993); therefore, pair-reared juveniles may  
540 behave more submissively. The subordinate role is a critically important one for juveniles  
541 because all will enter adult communities as subordinates. It will be necessary to measure  
542 behavior and reproductive success of these juveniles once they are adults in order to determine  
543 whether these phenotypes persist or if one is more successful than another (Pradhan, Solomon-  
544 Lane, & Grober, 2015).

545

#### 546 Early-life social environment affects neuroendocrine gene co-expression networks

547 We have shown that early-life environments can determine where individuals will end up  
548 along the axis of the newly discovered behavioral syndrome, which raises questions about the  
549 underlying mechanisms (e.g., pleiotropic genes and/or neuroendocrine regulation). The  
550 behavioral effects we detect as a result of the early-life social environment suggest important  
551 variation in the underlying neural regulatory mechanisms. Neuroendocrine stress and sex  
552 hormone signaling are likely sites of developmental plasticity in *A. burtoni* because they are



553 sensitive to early-life effects (Champagne & Curley, 2005; Shepard et al., 2009), translate  
554 environmental conditions and experiences into biological responses (Crespi & Denver, 2005;  
555 Wingfield et al., 1990), and regulate behavior (Adkins-Regan, 2009; Solomon-Lane, Crespi, &  
556 Grober, 2013). We focused on steroid hormone nuclear receptors specifically because they  
557 regulate the transcription of target genes with a diversity of physiological and behavioral roles  
558 (Rochette-Egly, 2005). Overall, gene expression was highly variable, especially among group-  
559 reared juveniles, possibly reflecting the considerable variability in experiences within groups.  
560 With the exception of GR1a, we found no significant differences when comparing the expression  
561 of single genes across rearing environments or treatment durations (Fig 4, Supplemental Fig 4),  
562 suggesting individual variation is strongly influenced by other factors, which we did not measure  
563 here (e.g., social status, body size, and sex). For example, social experience and status can both  
564 affect gene expression (Li et al., 2014). In adult male *A. burtoni*, the expression of AR $\alpha$ , MR,  
565 GR1a, and GR2 in the POA of the hypothalamus is higher in dominants, whereas GR1b is higher  
566 in subordinates (Korzan et al., 2014). Our behavior data suggest that an individual's position  
567 along the behavioral syndrome, as well as its social status, may be critical for understanding gene  
568 expression variation.

569         The expression of other genes can also contribute to expression variation.  
570 Neuroendocrine systems are dynamic and interact on multiple biological levels, including within  
571 gene regulatory networks (e.g., Huffman et al., 2012; Korzan, Fernald, & Grone, 2014;  
572 O'Connell & Hofmann, 2012). Based on their co-localization in the POA of *A. burtoni* (Korzan  
573 et al., 2014), co-localization and correlation in other species (e.g., Meyer & Korz, 2013), and  
574 overlapping physiological effects (Crespi & Denver, 2005; Wingfield et al., 1990), the  
575 neuroendocrine pathways represented by our candidate genes are likely to functionally interact.

576 We identified striking differences in co-expression networks among juveniles reared in different  
577 environments. Expression was highly correlated in pair-reared juveniles (Fig 5A), such that  
578 every candidate gene was significantly correlated with at least two others. At the center of the  
579 network, AR $\alpha$  shares five significant connections. The two sex steroid hormone genes (AR $\alpha$ ,  
580 ER $\alpha$ ) are also integrated with the stress axis genes, which form distinct smaller networks: CRF-  
581 GR1a-GR1b and GR2-MR. In contrast, group-reared juveniles have only one significant partial  
582 correlation between ER $\alpha$  and GR1b, a connection that is not present in the pair-reared network  
583 (Fig 5B). There are no significant partial correlations for isolated juveniles, suggesting that the  
584 neuroendocrine regulatory network is dysregulated, possibly due to isolation acting as a stressor  
585 (Galhardo and Oliveira, 2014). These network differences might underlie the behavioral  
586 differences we identified in the behavioral syndrome, subordinate behavior, or more broadly  
587 related to stress response (see below). The differential co-regulation could also serve to make  
588 behavior more similar in the face of other neural differences caused by rearing environment, as is  
589 the case for some neural sex differences and behavior (De Vries, 2004). These hypotheses can be  
590 tested directly using central pharmacological manipulation.

591

### 592 Complex regulation of neural stress and sex steroid signaling by the early-life social environment

593 From the gene co-expression networks alone, it is challenging to determine whether  
594 specific genes drive the significant differences across treatment groups. This is where  
595 decomposing the total variance into principal components offers a powerful approach that  
596 allowed us to show that the HPI axis plays a central, and likely highly-conserved (Crespi and  
597 Denver, 2005), role in responding to the early-life social environment in juvenile *A. burtoni*.  
598 First, PCA revealed that the neural expression of ER $\alpha$ , MR, and CRF strongly loaded on PC1,

599 which explains 69.1% of the variance (Fig 6C). The trend for differences in PC1 based on  
600 treatment duration (Fig 6A) suggests that we cannot rule out that neuroendocrine gene  
601 expression patterns change in important ways over the course of development. Because all  
602 juveniles entered treatment at the same age and developmental stage, future work is needed to  
603 distinguish between the effects of treatment duration and age (if any), and to identify possible  
604 critical periods for early-life effects.

605         Second, scores for PC4 (5.7%) were significantly different between group- and pair-  
606 reared juveniles (Fig 6B). All of the GRs, as well as AR, load on PC4 and contribute to the  
607 treatment effect (Fig 6C). Many teleosts, including *A. burtoni*, have three glucocorticoid  
608 receptors: MR, GR1, and GR2. Receptor 1 has splice variants 1a and 1b, which differ by a nine  
609 amino acid insertion in the DNA-binding domain of 1b that reduces transcriptional response  
610 (Greenwood et al., 2003; Korzan et al., 2014). Consistent with the distinct roles for the different  
611 receptors and splice variants (Greenwood et al., 2003), GR1a and GR2 load in the opposite  
612 direction from GR1b and AR $\alpha$  (Fig 6C), suggesting their expression may be antagonistically  
613 regulated (e.g., Fig 5A). Changes in HPA/I axis function typically manifest as altered baseline  
614 levels of circulating glucocorticoids, a higher or lower glucocorticoid ‘peak’ in response to an  
615 acute stressor, and/or altered efficiency of the negative feedback loop that returns the system to  
616 baseline. Negative feedback, in particular, is regulated by neural GR expression and can be  
617 affected by early-life experience (Champagne and Curley, 2005; Francis et al., 1999). This  
618 suggests either group- or pair-reared juveniles, or both, may have altered negative feedback  
619 mechanisms via differential GR expression. In particular, the hippocampus and amygdala (and  
620 their non-mammalian homologs), brain regions important in spatial cognition and emotional  
621 processing, respectively, are central to negative feedback (Denver, 2009).

622 Finally, none of the endpoints we measured loaded on PC2 (11.3%) or PC3 (7.17%),  
623 suggesting that there are likely other molecular pathways involved that we did not assay, which  
624 is to be expected for a complex phenotype such as social behavior. A genome-scale analysis of  
625 gene expression using RNA-seq can provide novel candidates here.

626

### 627 Integrating the effects of early-life social environments on behavior and brain

628 Our work demonstrates that early-life social environments shape behavioral phenotype  
629 and neuroendocrine gene expression in powerful ways for *A. burtoni* juveniles. In this study, we  
630 quantified behavior and gene expression in separate experiments in order to focus on different  
631 developmental time points. However, understanding the full scope and consequences of early-  
632 life effects requires measuring brain and behavior in the same individuals, throughout  
633 development and into adulthood. This work can begin to address the fact that across species,  
634 remarkably little is known about the mechanisms that shape the ontogeny of behavior (Taborsky,  
635 2016). Our results suggest that brain regions that express GRs and AR $\alpha$  (Greenwood et al., 2003;  
636 Korzan et al., 2014; Munchrath and Hofmann, 2010), along with brain regions of the social  
637 decision-making network (SDMN) that together regulate social behavior (O’Connell and  
638 Hofmann, 2012b), are likely to be sensitive to early-life effects and could cause the observed  
639 changes in behavior. Interestingly, the POA—a critical node in the SDMN (O’Connell and  
640 Hofmann, 2012b)—contains GR1a, GR1b, GR2, and AR $\alpha$  in adult *A. burtoni* (Korzan et al.,  
641 2014; Munchrath and Hofmann, 2010). Additional SDMN nodes, such as the hippocampus and  
642 amygdala are also likely sites of overlap. Interactions between the HPI axis and androgen  
643 signaling, including in the POA, could be a mechanism for the social regulation of development  
644 (Fraley and Fernald, 1982; Korzan et al., 2014; Solomon-Lane et al., 2013; Wada, 2008).

645 Another hypothesis is that the behavior patterns sensitive to early-life effects and HPI axis  
646 function will together form a specific kind of syndrome called a coping style, which ranges from  
647 proactive to reactive copers. Proactive copers tend to be more active, aggressive, and less  
648 responsive to stress (i.e., lower baseline glucocorticoid levels, faster negative feedback) than  
649 reactive copers (Koolhaas et al., 1999). Overall, this research can uncover the neuroendocrine  
650 mechanisms by which early-life social experience gives rise to individual variation in adults,  
651 which is critical to understanding subsequent disparities in fitness and health.

652

### 653 **Acknowledgements**

654 We thank Savannah Clapp, Pamela Del Valle, and Najah Hussain for assistance with data  
655 collection and fish maintenance and care. We thank Becca Young for helpful comments on  
656 earlier versions of this manuscript and members of the Hofmann Lab for discussion and  
657 feedback.

658

### 659 **Funding**

660 This work was supported by NSF grant IOS-1354942 to HAH and the BEACON Center for the  
661 Study of Evolution in Action awards #947 (2016) and #1081 (2017) to TKSL.

662

663 **Declarations of interest:** None.

664

## 665 **References**

- 666 Adkins-Regan, E., 2009. Neuroendocrinology of Social Behavior. *ILAR J.* 50, 5–14.  
667 <https://doi.org/10.1093/ilar.50.1.5>
- 668 Alcazar, R.M., Hilliard, A.T., Becker, L., Bernaba, M., Fernald, R.D., 2014. Brains over brawn:  
669 experience overcomes a size disadvantage in fish social hierarchies. *J. Exp. Biol.* 217,  
670 1462–1468. <https://doi.org/10.1242/jeb.097527>
- 671 Alvarado, S.G., Lenkov, K., Williams, B., Fernald, R.D., 2015. Social crowding during  
672 development causes changes in GnRH1 DNA methylation. *PLoS One* 10, 1–13.  
673 <https://doi.org/10.1371/journal.pone.0142043>
- 674 Arnold, C., Taborsky, B., 2010. Social experience in early ontogeny has lasting effects on social  
675 skills in cooperatively breeding cichlids. *Anim. Behav.* 79, 621–630.  
676 <https://doi.org/10.1016/j.anbehav.2009.12.008>
- 677 Banerjee, S.B., Arterbery, A.S., Fergus, D.J., Adkins-Regan, E., 2012. Deprivation of maternal  
678 care has long-lasting consequences for the hypothalamic-pituitary-adrenal axis of zebra  
679 finches. *Proc. R. Soc. B Biol. Sci.* 279, 759–766. <https://doi.org/10.1098/rspb.2011.1265>
- 680 Bell, A.M., 2007. Future directions in behavioural syndromes research. *Proc. R. Soc. B Biol. Sci.*  
681 274, 755–761. <https://doi.org/10.1098/rspb.2006.0199>
- 682 Benjamini, Y., Hochberg, Y., 1995. Controlling the False Discovery Rate: A Practical and  
683 Powerful Approach to Multiple Testing. *J. R. Stat. Soc. Ser. B.*  
684 <https://doi.org/10.2307/2346101>
- 685 Bennett, D. a, Schneider, J. a, Tang, Y., Arnold, S.E., Wilson, R.S., 2006. The effect of social  
686 networks on the relation between Alzheimer’s disease pathology and level of cognitive  
687 function in old people: a longitudinal cohort study. *Lancet. Neurol.* 5, 406–12.  
688 [https://doi.org/10.1016/S1474-4422\(06\)70417-3](https://doi.org/10.1016/S1474-4422(06)70417-3)
- 689 Bonuti, R., Morato, S., 2018. Proximity as a predictor of social behavior in rats. *J. Neurosci.*  
690 *Methods* 293, 37–44. <https://doi.org/10.1016/j.jneumeth.2017.08.027>
- 691 Branchi, I., D’Andrea, I., Fiore, M., Di Fausto, V., Aloe, L., Alleva, E., 2006. Early Social  
692 Enrichment Shapes Social Behavior and Nerve Growth Factor and Brain-Derived  
693 Neurotrophic Factor Levels in the Adult Mouse Brain. *Biol. Psychiatry* 60, 690–696.  
694 <https://doi.org/10.1016/j.biopsych.2006.01.005>
- 695 Branchi, I., Santarelli, S., D’Andrea, I., Alleva, E., 2013. Not all stressors are equal: Early social  
696 enrichment favors resilience to social but not physical stress in male mice. *Horm. Behav.*  
697 63, 503–509. <https://doi.org/10.1016/j.yhbeh.2013.01.003>
- 698 Brown, G.R., Spencer, K.A., 2013. Steroid hormones, stress and the adolescent brain: A  
699 comparative perspective. *Neuroscience* 249, 115–128.  
700 <https://doi.org/10.1016/j.neuroscience.2012.12.016>
- 701 Buist, K.L., Deković, M., Prinzie, P., 2013. Sibling relationship quality and psychopathology of  
702 children and adolescents: A meta-analysis. *Clin. Psychol. Rev.* 33, 97–106.  
703 <https://doi.org/10.1016/j.cpr.2012.10.007>
- 704 Cachat, J., Stewart, A., Grossman, L., Gaikwad, S., Kadri, F., Chung, K.M., Wu, N., Wong, K.,  
705 Roy, S., Suci, C., Goodspeed, J., Elegante, M., Bartels, B., Elkhayat, S., Tien, D., Tan, J.,  
706 Denmark, A., Gilder, T., Kyzar, E., Dileo, J., Frank, K., Chang, K., Utterback, E., Hart, P.,  
707 Kalueff, A. V., 2010. Measuring behavioral and endocrine responses to novelty stress in  
708 adult zebrafish. *Nat. Protoc.* 5, 1786–1799. <https://doi.org/10.1038/nprot.2010.140>
- 709 Champagne, F.A., 2010. Early adversity and developmental Outcomes: Interaction between

- 710 Genetics, Epigenetics, and social experiences across the Life Span. *Perspect. Psychol. Sci.*  
711 5, 564–574. <https://doi.org/10.1177/1745691610383494>
- 712 Champagne, F.A., Curley, J.P., 2005. How social experiences influence the brain. *Curr. Opin.*  
713 *Neurobiol.* 15, 704–709. <https://doi.org/10.1016/j.conb.2005.10.001>
- 714 Champagne, F.A., Meaney, M.J., 2007. Transgenerational effects of social environment on  
715 variations in maternal care and behavioral response to novelty. *Behav. Neurosci.* 121, 1353–  
716 1363. <https://doi.org/10.1037/0735-7044.121.6.1353>
- 717 Champagne, F.A., Weaver, I.C.G., Diorio, J., Sharma, S., Meaney, M.J., 2003. Natural  
718 Variations in Maternal Care Are Associated with Estrogen Receptor  $\alpha$  Expression and  
719 Estrogen Sensitivity in the Medial Preoptic Area. *Endocrinology* 144, 4720–4724.  
720 <https://doi.org/10.1210/en.2003-0564>
- 721 Chen, C.-C., Fernald, R.D., 2008. Sequences, expression patterns and regulation of the  
722 corticotropin-releasing factor system in a teleost. *Gen. Comp. Endocrinol.* 157, 148–155.  
723 <https://doi.org/10.1016/j.ygcen.2008.04.003>
- 724 Conrad, J.L., Weinersmith, K.L., Brodin, T., Saltz, J.B., Sih, A., 2011. Behavioural syndromes in  
725 fishes: A review with implications for ecology and fisheries management. *J. Fish Biol.* 78,  
726 395–435. <https://doi.org/10.1111/j.1095-8649.2010.02874.x>
- 727 Creel, S.R., Dantzer, B., Goymann, W., Rubenstein, D.R., 2013. The ecology of stress: effects of  
728 the social environment. *Funct. Ecol.* 27, 66–80. <https://doi.org/10.1111/j.1365-2435.2012.02029.x>
- 730 Crespi, E.J., Denver, R.J., 2005. Ancient origins of human developmental plasticity. *Am. J.*  
731 *Hum. Biol.* 17, 44–54. <https://doi.org/10.1002/ajhb.20098>
- 732 D'Andrea, I., Alleva, E., Branchi, I., 2007. Communal nesting, an early social enrichment,  
733 affects social competences but not learning and memory abilities at adulthood. *Behav. Brain*  
734 *Res.* 183, 60–66. <https://doi.org/10.1016/j.bbr.2007.05.029>
- 735 Davis, M.R., Fernald, R.D., 1990. Social control of neuronal soma size. *J. Neurobiol.* 21, 1180–  
736 1188. <https://doi.org/10.1002/neu.480210804>
- 737 De Vries, G.J., 2004. Minireview: Sex Differences in Adult and Developing Brains:  
738 Compensation, Compensation, Compensation. *Endocrinology* 145, 1063–1068.  
739 <https://doi.org/10.1210/en.2003-1504>
- 740 Denver, R.J., 2009. Structural and functional evolution of vertebrate neuroendocrine stress  
741 systems. *Ann. N. Y. Acad. Sci.* 1163, 1–16. <https://doi.org/10.1111/j.1749-6632.2009.04433.x>
- 743 Desjardins, J.K., Hofmann, H.A., Fernald, R.D., 2012. Social Context Influences Aggressive and  
744 Courtship Behavior in a Cichlid Fish. *PLoS One* 7, e32781.  
745 <https://doi.org/10.1371/journal.pone.0032781>
- 746 Desjardins, J.K., Klausner, J.Q., Fernald, R.D., 2010. Female genomic response to mate  
747 information. *Proc. Natl. Acad. Sci. U. S. A.* 107, 21176–21180.  
748 <https://doi.org/10.1073/pnas.1010442107>
- 749 Drews, C., 1993. The concept and definition of dominance in animal behaviour. *Behaviour* 125,  
750 283–313. <https://doi.org/10.1163/156853993X00290>
- 751 Fernald, R.D., 2012. Social Control of the Brain. *Annu. Rev. Neurosci.* 35, 133–151.  
752 <https://doi.org/10.1146/annurev-neuro-062111-150520>
- 753 Fernald, R.D., Hirata, N.R., 1979. The Ontogeny of Social behavior and body coloration in the  
754 african cichlid fish *haplochromis burtoni*. *Zeitschrift für Tierpsychologie.*  
755 <https://doi.org/10.1111/j.1439-0310.1979.tb01025.x>

- 756 Fernald, R.D., Maruska, K.P., 2012. Social information changes the brain. *Proc. Natl. Acad. Sci.*  
757 109, 17194–17199. <https://doi.org/10.1073/pnas.1202552109>
- 758 Fischer, S., Bessert-Nettelbeck, M., Kotrschal, A., Taborsky, B., 2015. Rearing-Group Size  
759 Determines Social Competence and Brain Structure in a Cooperatively Breeding Cichlid.  
760 *Am. Nat.* 186, 123–140. <https://doi.org/10.1086/681636>
- 761 Fox, H.E., White, S. a, Kao, M.H., Fernald, R.D., 1997. Stress and dominance in a social fish. *J.*  
762 *Neurosci.* 17, 6463–6469.
- 763 Fraley, N.B., Fernald, R.D., 1982. Social control of developmental rate in the African cichlid,  
764 *Haplochromis burtoni*. *Z.Tierpsychol.* 60, 66–82. [https://doi.org/10.1111/j.1439-](https://doi.org/10.1111/j.1439-0310.1982.tb01077.x)  
765 [0310.1982.tb01077.x](https://doi.org/10.1111/j.1439-0310.1982.tb01077.x)
- 766 Francis, D.D., Caldji, C., Champagne, F.A., Plotsky, P.M., Meaney, M.J., 1999. The role of  
767 corticotropin-releasing factor–norepinephrine systems in mediating the effects of early  
768 experience on the development of behavioral and endocrine responses to stress. *Biol.*  
769 *Psychiatry* 46, 1153–1166. [https://doi.org/10.1016/S0006-3223\(99\)00237-1](https://doi.org/10.1016/S0006-3223(99)00237-1)
- 770 Galhardo, L., Oliveira, R.F., 2014. The effects of social isolation on steroid hormone levels are  
771 modulated by previous social status and context in a cichlid fish. *Horm. Behav.* 65, 1–5.  
772 <https://doi.org/10.1016/j.yhbeh.2013.10.010>
- 773 Gilbert, S.F., 2001. Ecological Developmental Biology: Developmental Biology Meets the Real  
774 World. *Dev. Biol.* 233, 1–12. <https://doi.org/10.1006/dbio.2001.0210>
- 775 Goodson, J.L., 2005. The vertebrate social behavior network: Evolutionary themes and  
776 variations. *Horm. Behav.* 48, 11–22. <https://doi.org/10.1016/j.yhbeh.2005.02.003>
- 777 Greenwood, A.K., Butler, P.C., White, R.B., Demarco, U., Pearce, D., Fernald, R.D., 2003.  
778 Multiple corticosteroid receptors in a teleost fish: Distinct sequences, expression patterns,  
779 and transcriptional activities. *Endocrinology* 144, 4226–4236.  
780 <https://doi.org/10.1210/en.2003-0566>
- 781 Groothuis, T.G.G., Carere, C., 2005. Avian personalities: Characterization and epigenesis.  
782 *Neurosci. Biobehav. Rev.* 29, 137–150. <https://doi.org/10.1016/j.neubiorev.2004.06.010>
- 783 Grosenick, L., Clement, T.S., Fernald, R.D., 2007. Fish can infer social rank by observation  
784 alone. *Nature* 445, 429–432. <https://doi.org/10.1038/nature05646>
- 785 Henry, M.D., Hankerson, S.J., Siani, J.M., French, J.A., Dietz, J.M., 2013. High rates of  
786 pregnancy loss by subordinates leads to high reproductive skew in wild golden lion  
787 tamarins (*Leontopithecus rosalia*). *Horm. Behav.* 63, 675–683.  
788 <https://doi.org/10.1016/j.yhbeh.2013.02.009>
- 789 Hofmann, H.A., 2003. Functional genomics of neural and behavioral plasticity. *J. Neurobiol.* 54,  
790 272–282. <https://doi.org/10.1002/neu.10172>
- 791 Hofmann, H.A., Benson, M.E., Fernald, R.D., 1999. Social status regulates growth rate:  
792 consequences for life-history strategies. *Proc. Natl. Acad. Sci. U. S. A.* 96, 14171–6.  
793 <https://doi.org/10.1073/pnas.96.24.14171>
- 794 Hofmann, H.A., Fernald, R.D., 2001. What cichlids tell us about the social regulation of brain  
795 and behavior. *J. Aquaric. Aquat. Sci.* 9, 17–31.
- 796 Huffman, L.S., Mitchell, M.M., O’Connell, L.A., Hofmann, H.A., 2012. Rising StARs:  
797 Behavioral, hormonal, and molecular responses to social challenge and opportunity. *Horm.*  
798 *Behav.* 61, 631–641. <https://doi.org/10.1016/j.yhbeh.2012.02.016>
- 799 Jonsson, B., Jonsson, N., 2014. Early environment influences later performance in fishes. *J. Fish*  
800 *Biol.* 85, 151–188. <https://doi.org/10.1111/jfb.12432>
- 801 Kaiser, S., Kruijver, F.P.M., Swaab, D.F., Sachser, N., 2003. Early social stress in female guinea



- 802 pigs induces a masculinization of adult behavior and corresponding changes in brain and  
803 neuroendocrine function. *Behav. Brain Res.* 144, 199–210. [https://doi.org/10.1016/S0166-4328\(03\)00077-9](https://doi.org/10.1016/S0166-4328(03)00077-9)
- 805 Kasumovic, M.M., Brooks, R.C., 2011. It's All Who You Know: The Evolution Of Socially  
806 Cued Anticipatory Plasticity As A Mating Strategy. *Q. Rev. Biol.* 86, 181–197.  
807 <https://doi.org/10.1086/661119>
- 808 Ketterson, E.D., Nolan, Jr., V., 1999. Adaptation, Exaptation, and Constraint: A Hormonal  
809 Perspective. *Am. Nat.* 154, S4–S25. <https://doi.org/10.1086/303280>
- 810 Koolhaas, J.M., Korte, S.M., De Boer, S.F., Van Der Vegt, B.J., Van Reenen, C.G., Hopster, H.,  
811 De Jong, I.C., Ruis, M. a W., Blokhuis, H.J., 1999. Coping styles in animals: Current status  
812 in behavior and stress- physiology. *Neurosci. Biobehav. Rev.* 23, 925–935.  
813 [https://doi.org/10.1016/S0149-7634\(99\)00026-3](https://doi.org/10.1016/S0149-7634(99)00026-3)
- 814 Korzan, W.J., Fernald, R.D., Grone, B.P., 2014. Social regulation of cortisol receptor gene  
815 expression. *J. Exp. Biol.* 3221–3228. <https://doi.org/10.1242/jeb.104430>
- 816 Li, C.-Y., Earley, R.L., Huang, S.-P., Hsu, Y., 2014. Fighting experience alters brain androgen  
817 receptor expression dependent on testosterone status. *Proc. R. Soc. B Biol. Sci.* 281,  
818 20141532–20141532. <https://doi.org/10.1098/rspb.2014.1532>
- 819 Lowry, C. a., Moore, F.L., 2006. Regulation of behavioral responses by corticotropin-releasing  
820 factor. *Gen. Comp. Endocrinol.* 146, 19–27. <https://doi.org/10.1016/j.ygcen.2005.12.006>
- 821 Lummaa, V., Clutton-Brock, T., 2002. Early development, survival and reproduction in humans.  
822 *Trends Ecol. Evol.* 17, 141–147. [https://doi.org/10.1016/s0169-5347\(01\)02414-4](https://doi.org/10.1016/s0169-5347(01)02414-4)
- 823 Maruska, K.P., Fernald, R.D., 2010. Steroid receptor expression in the fish inner ear varies with  
824 sex, social status, and reproductive state. *BMC Neurosci.* 11, 58.  
825 <https://doi.org/10.1186/1471-2202-11-58>
- 826 McClelland, S., Korosi, A., Cope, J., Ivy, A., Baram, T.Z., 2011. Emerging roles of epigenetic  
827 mechanisms in the enduring effects of early-life stress and experience on learning and  
828 memory. *Neurobiol. Learn. Mem.* 96, 79–88. <https://doi.org/10.1016/j.nlm.2011.02.008>
- 829 Meyer-Lindenberg, A., Tost, H., 2012. Neural mechanisms of social risk for psychiatric  
830 disorders. *Nat. Neurosci.* 15, 663–668. <https://doi.org/10.1038/nn.3083>
- 831 Meyer, K., Korz, V., 2013. Estrogen receptor  $\alpha$  functions in the regulation of motivation and  
832 spatial cognition in young male rats. *PLoS One* 8.  
833 <https://doi.org/10.1371/journal.pone.0079303>
- 834 Moy, S.S., Nadler, J.J., Perez, A., Barbaro, R.P., Johns, J.M., Magnuson, T.R., Piven, J.,  
835 Crawley, J.N., 2004. Sociability and preference for social novelty in five inbred strains: an  
836 approach to assess autistic-like behavior in mice. *Genes, Brain Behav.* 3, 287–302.  
837 <https://doi.org/10.1111/j.1601-1848.2004.00076.x>
- 838 Munchrath, L.A., Hofmann, H.A., 2010. Distribution of sex steroid hormone receptors in the  
839 brain of an african cichlid fish, *astatotilapia burtoni*. *J. Comp. Neurol.* 518, 3302–3326.  
840 <https://doi.org/10.1002/cne.22401>
- 841 Näslund, J., Johnsson, J.I., 2016. State-dependent behavior and alternative behavioral strategies  
842 in brown trout (*Salmo trutta* L.) fry. *Behav. Ecol. Sociobiol.* 70, 2111–2125.  
843 <https://doi.org/10.1007/s00265-016-2215-y>
- 844 Newman, S., 1999. The medial extended amygdala in male reproductive behavior. *Ann NY Acad*  
845 *Sci* 242–257.
- 846 O'Connell, L.A., Hofmann, H.A., 2012a. Social Status Predicts How Sex Steroid Receptors  
847 Regulate Complex Behavior across Levels of Biological Organization. *Endocrinology* 153,

- 848 1341–1351. <https://doi.org/10.1210/en.2011-1663>
- 849 O’Connell, L.A., Hofmann, H.A., 2012b. Evolution of a Vertebrate Social Decision-Making  
850 Network. *Science* (80-. ). 336, 1154–1157. <https://doi.org/10.1126/science.1218889>
- 851 Piersma, T., Drent, J., 2003. Phenotypic flexibility and the evolution of organismal design.  
852 *Trends Ecol. Evol.* 18, 228–233. [https://doi.org/10.1016/S0169-5347\(03\)00036-3](https://doi.org/10.1016/S0169-5347(03)00036-3)
- 853 Pradhan, D.S., Solomon-Lane, T.K., Grober, M.S., 2015. Contextual modulation of social and  
854 endocrine correlates of fitness: insights from the life history of a sex changing fish. *Front.*  
855 *Neurosci.* 9, 1–21. <https://doi.org/10.3389/fnins.2015.00008>
- 856 Prut, L., Belzung, C., 2003. The open field as a paradigm to measure the effects of drugs on  
857 anxiety-like behaviors: A review. *Eur. J. Pharmacol.* 463, 3–33.  
858 [https://doi.org/10.1016/S0014-2999\(03\)01272-X](https://doi.org/10.1016/S0014-2999(03)01272-X)
- 859 Remage-Healey, L., Romero, L.M., 2000. Daily and seasonal variation in response to stress in  
860 captive starlings (*sturnus vulgaris*): Glucose. *Gen. Comp. Endocrinol.* 119, 60–68.  
861 <https://doi.org/10.1006/gcen.2000.7492>
- 862 Renn, S., Carleton, J.B., Magee, H., Nguyen, M.L.T., Tanner, A.C.W., 2009. Maternal care and  
863 altered social phenotype in a recently collected stock of *Astatotilapia burtoni* cichlid fish.  
864 *Integr. Comp. Biol.* 49, 660–673. <https://doi.org/10.1093/icb/icp085>
- 865 Renn, S.C.P., Aubin-Horth, N., Hofmann, H.A., 2008. Fish and chips: functional genomics of  
866 social plasticity in an African cichlid fish. *J. Exp. Biol.* 211, 3041–3056.  
867 <https://doi.org/10.1242/jeb.018242>
- 868 Robbins, M.M., Robbins, A.M., Gerald-Steklis, N., Steklis, H.D., 2007. Socioecological  
869 influences on the reproductive success of female mountain gorillas (*Gorilla beringei*  
870 *beringei*). *Behav. Ecol. Sociobiol.* 61, 919–931. <https://doi.org/10.1007/s00265-006-0321-y>
- 871 Rochette-Egly, C., 2005. Dynamic combinatorial networks in nuclear receptor-mediated  
872 transcription. *J. Biol. Chem.* 280, 32565–32568. <https://doi.org/10.1074/jbc.R500008200>
- 873 Saltz, J.B., Geiger, A.P., Anderson, R., Johnson, B., Marren, R., 2016. What, if anything, is a  
874 social niche? *Evol. Ecol.* 30, 349–364. <https://doi.org/10.1007/s10682-015-9792-5>
- 875 Shepard, K.N., Michopoulos, V., Toufexis, D.J., Wilson, M.E., 2009. Genetic, epigenetic and  
876 environmental impact on sex differences in social behavior. *Physiol. Behav.* 97, 157–170.  
877 <https://doi.org/10.1016/j.physbeh.2009.02.016>
- 878 Sih, A., Bell, A.M., Johnson, J.C., 2004a. Behavioral syndromes: an ecological and evolutionary  
879 overview. *Trends Ecol. Evol.* 19, 372–378. <https://doi.org/10.1016/j.tree.2004.04.009>
- 880 Sih, A., Bell, A.M., Ziemba, R.E., 2004b. Behavioural syndromes: An integrative overview. *Q.*  
881 *Rev. Biol.* 80, 1–1. <https://doi.org/10.1086/516403>
- 882 Silk, J.B., 2007. Social Components of Fitness in Primate Groups. *Science* (80-. ). 317, 1347–  
883 1351. <https://doi.org/10.1126/science.1140734>
- 884 Smith, B.R., Blumstein, D.T., 2008. Fitness consequences of personality: A meta-analysis.  
885 *Behav. Ecol.* 19, 448–455. <https://doi.org/10.1093/beheco/arm144>
- 886 Snell-Rood, E.C., 2013. An overview of the evolutionary causes and consequences of  
887 behavioural plasticity. *Anim. Behav.* 85, 1004–1011.  
888 <https://doi.org/10.1016/j.anbehav.2012.12.031>
- 889 Solomon-Lane, T.K., Crespi, E.J., Grober, M.S., 2013. Stress and serial adult metamorphosis :  
890 multiple roles for the stress axis in socially regulated sex change. *Front. Neuroendocrinol.* 7,  
891 1–12. <https://doi.org/10.3389/fnins.2013.00210>
- 892 Solomon-Lane, T.K., Pradhan, D.S., Willis, M.C., Grober, M.S., 2015. Agonistic reciprocity is  
893 associated with reduced male reproductive success within harem social networks. *Proc. R.*

- 894 Soc. B Biol. Sci. 282, 20150914. <https://doi.org/10.1098/rspb.2015.0914>
- 895 Solomon-Lane, T.K., Pradhan, D.S., Willis, M.C., Grober, M.S., 2014. Female, but not male,  
896 agonistic behaviour is associated with male reproductive success in stable bluebanded goby  
897 (*Lythrypnus dalli*) hierarchies. *Behaviour* 151, 1367–1387.  
898 <https://doi.org/10.1163/1568539X-00003188>
- 899 Stamps, J.A., 2003. Behavioural processes affecting development: Tinbergen's fourth question  
900 comes of age. *Anim. Behav.* 66, 1–13. <https://doi.org/10.1006/anbe.2003.2180>
- 901 Stamps, J.A., Groothuis, T.G.G., 2010. The development of animal personality: Relevance,  
902 concepts and perspectives. *Biol. Rev.* 85, 301–325. <https://doi.org/10.1111/j.1469->  
903 [185X.2009.00103.x](https://doi.org/10.1111/j.1469-185X.2009.00103.x)
- 904 Stearns, S.C., 1989. The Evolutionary Significance of Phenotypic Plasticity. *BioScience*, 39,  
905 436–445. <https://doi.org/10.2307/1311135>
- 906 Taborsky, B., 2016. Opening the Black Box of Developmental Experiments: Behavioural  
907 Mechanisms Underlying Long-Term Effects of Early Social Experience. *Ethology* 122,  
908 267–283. <https://doi.org/10.1111/eth.12473>
- 909 Taborsky, B., Arnold, C., Junker, J., Tschopp, A., 2012. The early social environment affects  
910 social competence in a cooperative breeder. *Anim. Behav.* 83, 1067–1074.  
911 <https://doi.org/10.1016/j.anbehav.2012.01.037>
- 912 Taborsky, B., Tschirren, L., Meunier, C., Aubin-Horth, N., 2013. Stable reprogramming of brain  
913 transcription profiles by the early social environment in a cooperatively breeding fish. *Proc.*  
914 *Biol. Sci.* 280, 20122605. <https://doi.org/10.1098/rspb.2012.2605>
- 915 Tinbergen, N., 1963. On aims and methods of Ethology. *Anim. Biol.* 55, 297–321.  
916 <https://doi.org/10.1163/157075605774840941>
- 917 Turecki, G., Meaney, M.J., 2016. Effects of the Social Environment and Stress on  
918 Glucocorticoid Receptor Gene Methylation: A Systematic Review. *Biol. Psychiatry* 79, 87–  
919 96. <https://doi.org/10.1016/j.biopsych.2014.11.022>
- 920 Verbeek, M.E.M., Drent, P.J., Wiepkema, P.R., 1994. Consistent individual differences in early  
921 exploratory behaviour of male great tits. *Anim. Behav.*  
922 <https://doi.org/10.1006/anbe.1994.1344>
- 923 Wada, H., 2008. Glucocorticoids: mediators of vertebrate ontogenetic transitions. *Gen. Comp.*  
924 *Endocrinol.* 156, 441–53. <https://doi.org/10.1016/j.ygcen.2008.02.004>
- 925 Weitekamp, C.A., Hofmann, H.A., 2017. Neuromolecular correlates of cooperation and conflict  
926 during territory defense in a cichlid fish. *Horm. Behav.* 89, 145–156.  
927 <https://doi.org/10.1016/j.yhbeh.2017.01.001>
- 928 Weitekamp, C.A., Solomon-Lane, T.K., Del Valle, P., Triki, Z., Nugent, B.M., Hofmann, H.A.,  
929 2017. A Role for Oxytocin-Like Receptor in Social Habituation in a Teleost. *Brain. Behav.*  
930 *Evol.* 89, 153–161. <https://doi.org/10.1159/000464098>
- 931 West-Eberhard, M.J., 1989. Phenotypic plasticity and the origins of diversity. *Annu. Rev. Ecol.*  
932 *Syst.* 20, 249–278. <https://doi.org/10.1146/annurev.es.20.110189.001341>
- 933 White, D.J., 2010. The Form and Function of Social Development - Insights From a Parasite.  
934 *Curr. Dir. Psychol. Sci.* 19, 314–318. <https://doi.org/10.1177/0963721410383384>
- 935 White, D.J., King, A.P., West, M.J., 2002. Facultative development of courtship and  
936 communication in juvenile male cowbirds (*Molothrus ater*). *Behav. Ecol.* 13, 487–496.  
937 <https://doi.org/10.1093/beheco/13.4.487>
- 938 Wilson, E.O., 1980. *Sociobiology: the Abridged Edition*. The Belknap Press of Harvard  
939 University Press, Cambridge.

- 940 Wingfield, J.C., Hegner, R.E., Dufty, Jr., A.M., Ball, G.F., 1990. The “Challenge Hypothesis”:  
941 Theoretical Implications for Patterns of Testosterone Secretion, Mating Systems, and  
942 Breeding Strategies. *Am. Nat.* 136, 829. <https://doi.org/10.1086/285134>  
943 Young, A.J., Carlson, A. a, Monfort, S.L., Russell, A.F., Bennett, N.C., Clutton-Brock, T., 2006.  
944 Stress and the suppression of subordinate reproduction in cooperatively breeding meerkats.  
945 *Proc. Natl. Acad. Sci.* 103, 12005–12010. <https://doi.org/10.1073/pnas.0510038103>  
946  
947

948 **Table 1:** Linear regressions of focal fish standard length with behavior in the open field, social  
 949 cue investigation, dominance, and subordinate behavior assays. The zones of the tank refer to the  
 950 frequency of entering that zone. Adjusted R<sup>2</sup> values are reported. Significant results following a  
 951 false discovery rate correction are bolded.

| <b>Assay</b>                    | <b>Behavior</b>                   | <b>r-squared</b> | <b>p-value</b> |
|---------------------------------|-----------------------------------|------------------|----------------|
| <b>Open field</b>               | Investigate zone                  | 0.17             | <b>0.0036</b>  |
|                                 | Far zone                          | 0.15             | <b>0.0059</b>  |
|                                 | Close zone                        | 0.11             | <b>0.017</b>   |
|                                 | Territory zone                    | 0.18             | <b>0.0028</b>  |
| <b>Social cue investigation</b> | Investigate zone                  | 0.035            | 0.13           |
|                                 | Far zone                          | 0.085            | <b>0.038</b>   |
|                                 | Close zone                        | 0.096            | <b>0.031</b>   |
|                                 | Territory zone                    | 0.11             | <b>0.021</b>   |
| <b>Dominance behavior</b>       | Approach                          | 0.089            | <b>0.035</b>   |
|                                 | Displace                          | 0.10             | <b>0.024</b>   |
|                                 | Territory zone (focal)            | 0.11             | <b>0.022</b>   |
|                                 | Territory zone (subordinate fish) | 0.14             | <b>0.011</b>   |
|                                 | Territory zone (both)             | 0.11             | <b>0.02</b>    |
| <b>Subordinate behavior</b>     | Approach                          | -0.02            | 0.57           |
|                                 | Displace                          | -0.0044          | 0.37           |
|                                 | Submit                            | -0.023           | 0.72           |
|                                 | Territory zone (focal)            | -0.0015          | 0.34           |
|                                 | Territory zone (subordinate fish) | -0.02            | 0.67           |
|                                 | Territory zone (both)             | -0.024           | 0.87           |

952

953

954

955

956 **Figures & legends**

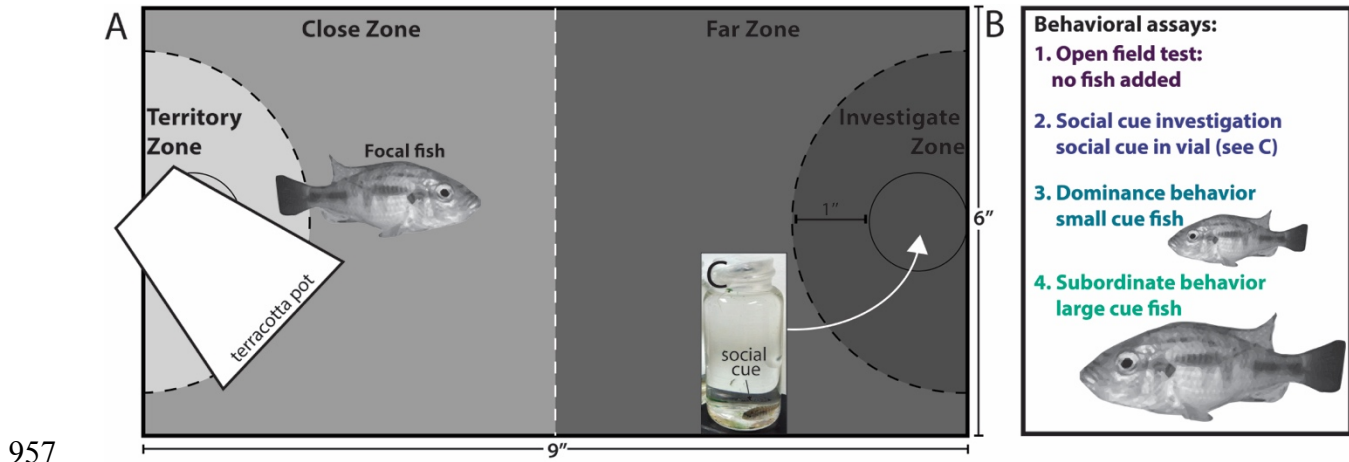

958 **Figure 1: Experimental setup for behavior assays.** Juvenile behavior was observed in a novel  
959 experimental tank in four sequential assays administered in the same order, each lasting 30 min.  
960 A terracotta shard served as a shelter and/or territory. The black lines (dotted, solid) were drawn  
961 on the tank bottom in permanent marker, dividing the tank into four zones: territory, close, far,  
962 and investigate. The center dividing line (white) was not drawn (A). The focal fish was alone in  
963 the tank for the open field assay, and the time in each zone and frequency of entered each zone  
964 was recorded (B, assay 1). For the social cue investigation, a juvenile inside of a scintillation vial  
965 was placed in the circle within the investigate zone (see C). The time in and frequency of  
966 entering each zone was recorded (B, assay 2). The social cue was removed and a freely  
967 swimming, novel cue fish (smaller than the focal) was added to the tank for the dominance  
968 behavior assay (B, assay 3). The small cue fish was then removed and a freely swimming, novel  
969 cue fish (larger than the focal) was added to the tank for the subordinate behavior assay (B, assay  
970 4). Social interactions were recorded for the dominant and subordinate behavior assays. The time  
971 in and frequency of entering the territory zone was also recorded for both fish.

972

973

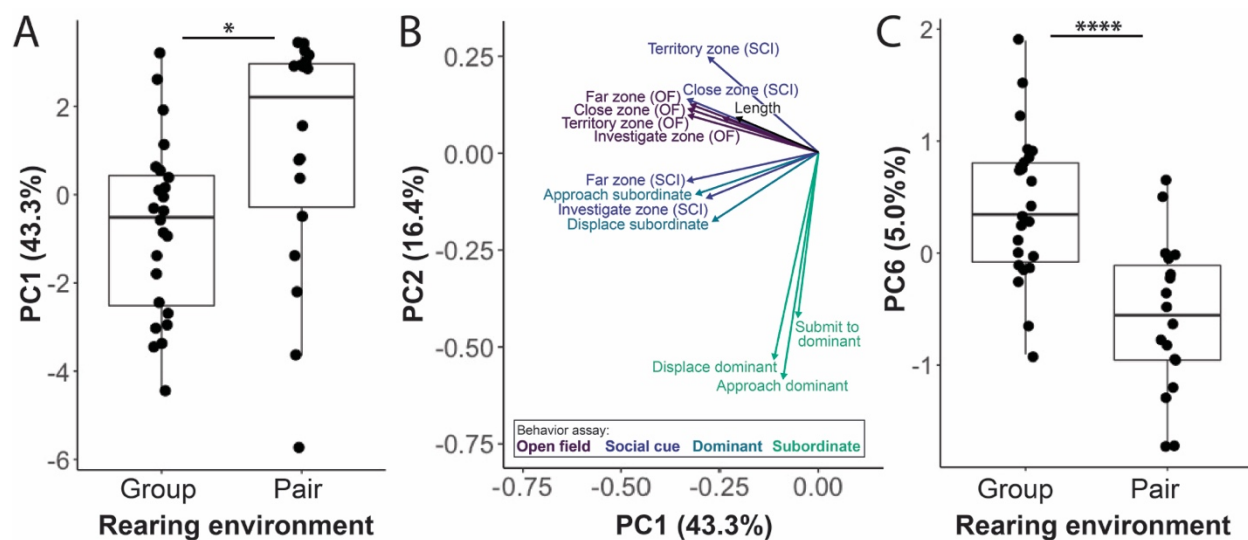

974

975 **Figure 2:** Principal component analysis (PCA) of focal fish behavior from all four assays (open  
 976 field, social cue investigation, dominance, subordinate behavior). Differences in PC1 between  
 977 group- and pair-reared juveniles ( $p=0.029$ ) (A). Vector plot showing the PCA variables that load  
 978 on PC1 (B). Differences in PC6 between group- and pair-reared juveniles ( $p= 4.082e-05$ ) (C).  
 979 Percentages refer to the amount of variation explained by that component. Pair ( $n=18$   
 980 individuals). Group ( $n=24$  individuals). Social cue investigation (SCI). Open field exploration  
 981 (OF). \* $p<0.05$ , \*\*\*\* $p<0.001$ .

982

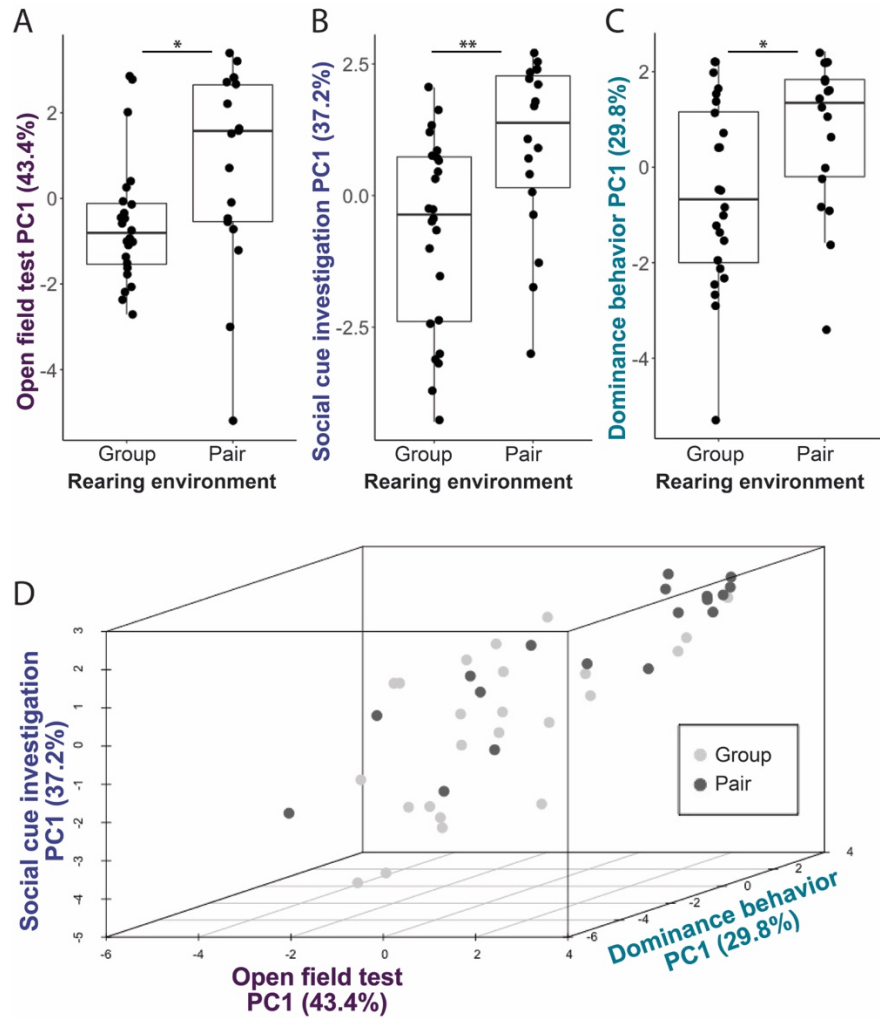

983

984 **Figure 3:** Separate principal component analyses performed for the open field (A), social cue  
985 investigation (B), and dominance behavior (C) assays. Both focal and non-focal fish variables  
986 (behavior, size). The significant, positive correlations about the PC1s are shown in a three-  
987 dimensional plot (D). Percentages refer to the amount of variation explained by that component.

988 Pair (n=18 individuals). Group (n=24 individuals).

989



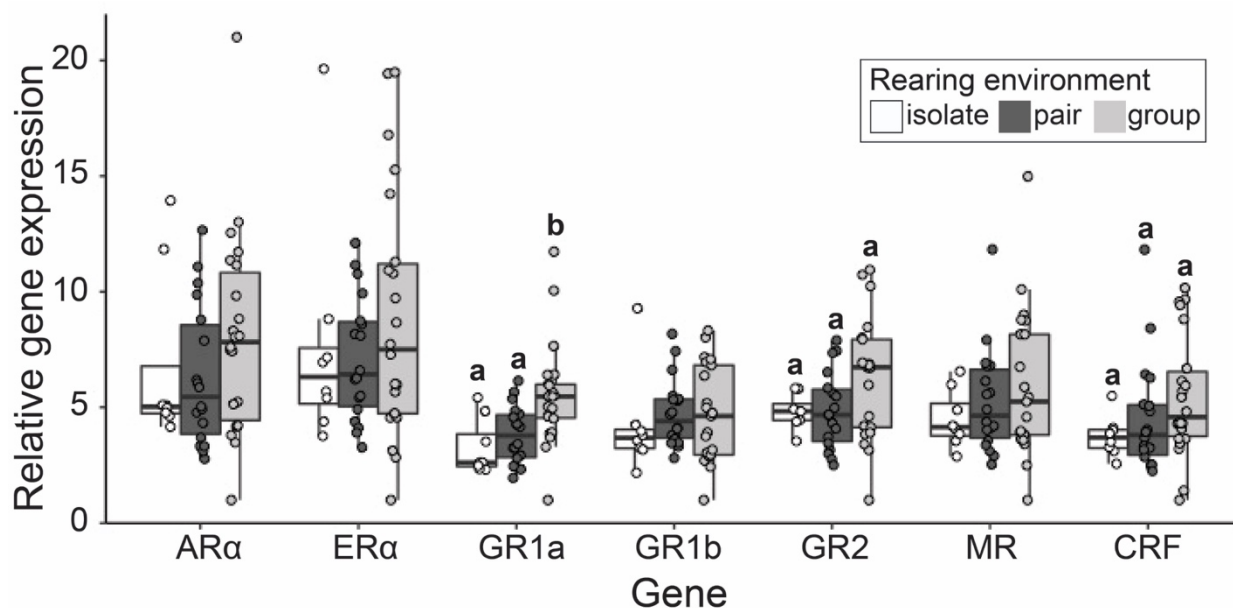

990

991 **Figure 4:** Relative gene expression calculated using  $\Delta\Delta\text{CT}$  analysis (reference gene 18S) for  
992 juveniles reared in isolation (1 week,  $n=8$ ), pairs (1 week or 5 weeks,  $n=18$ ), and groups (1 week  
993 or 5 weeks,  $n=22$ ). Androgen receptor  $\alpha$  (AR $\alpha$ ). Estrogen receptor  $\alpha$  (ER $\alpha$ ). Glucocorticoid  
994 receptors (GR). Mineralocorticoid receptor (MR). Corticotropin-releasing factor (CRF). Letters  
995 indicate significant *post hoc* differences within a gene ( $p < 0.05$ ).

996

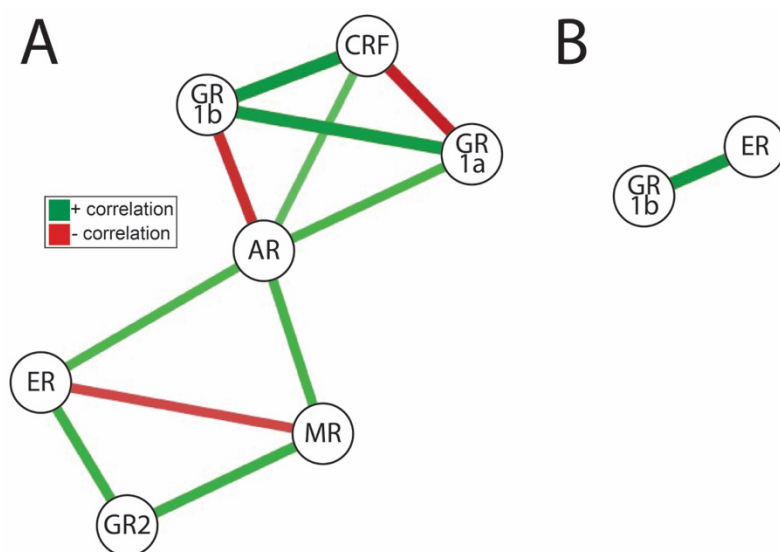

997

998 **Figure 5:** Partial correlation network of gene expression in pair-reared juveniles (n=18) (A) and

999 group-reared juveniles (n=22) (B). Nodes are the candidate genes. Edges represent partial

1000 correlations between nodes. Only significant partial correlations are shown ( $p < 0.05$ ), and edge

1001 thickness indicates correlation strength. There were no significant partial correlations for

1002 juveniles reared in isolation (n=8) ( $p > 0.05$ ). Androgen receptor  $\alpha$  (AR). Estrogen receptor  $\alpha$

1003 (ER). Glucocorticoid receptors (GR). Mineralocorticoid receptor (MR). Corticotropin-releasing

1004 factor (CRF).

1005

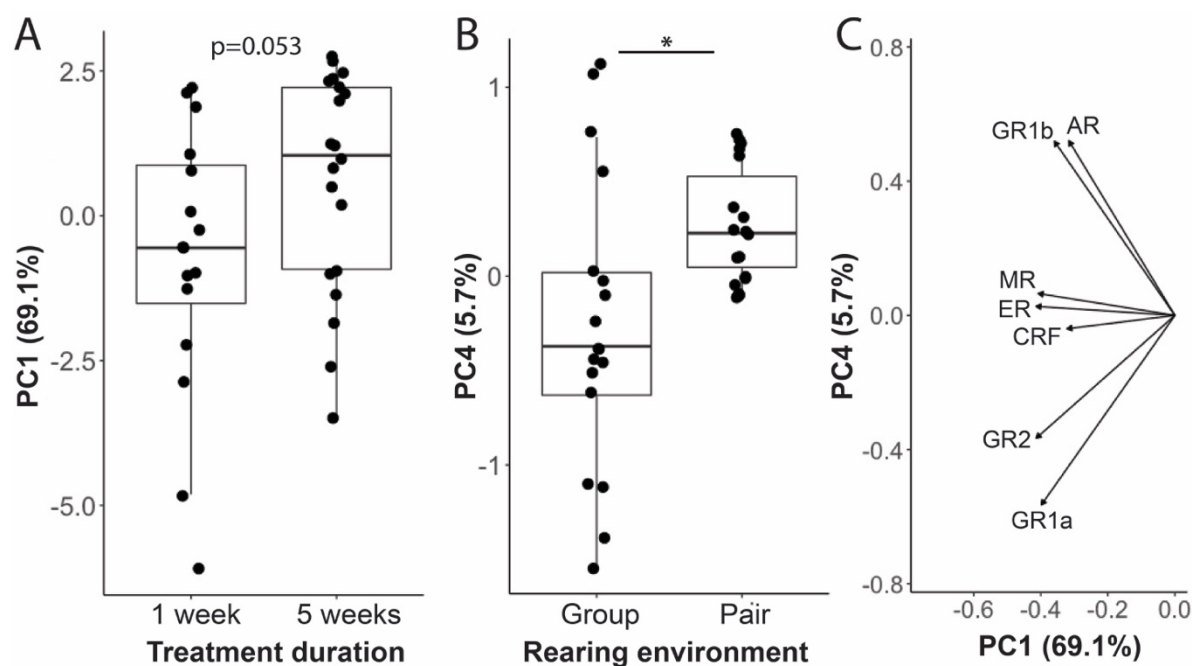

1006

1007 **Figure 6:** Principal component analysis of relative expression of candidate genes in whole brain

1008 from group- (n=22) and pair-reared (n=18) juveniles. Differences in PC1 between juveniles in

1009 treatment groups for 1 vs. 5 weeks (A). Differences in PC4 between juveniles reared in groups

1010 vs. pairs (p=0.011) (B). Vector plot showing how candidate genes load on PC1 and PC4 (C).

1011 Percentages refer to the amount of variation explained by that component. Androgen receptor  $\alpha$

1012 (AR). Estrogen receptor  $\alpha$  (ER). Glucocorticoid receptors (GR). Mineralocorticoid receptor

1013 (MR). Corticotropin-releasing factor (CRF).
